# Supplementary material for: Gate tunable self-powered few-layer black phosphorus broadband photodetector
Source: Royal Society of Chemistry journal article supplement (doi:10.1039/d0cp05292b), 2020-11-26
Supplement: d0cp05292b1.pdf [file d0cp05292b1.pdf]

# Supplementary Information: Physical Chemistry Chemical Physics: Gate tunable self-powered few-layer black phosphorus broadband photodetector

Xiaofei Guo,<sup>a</sup> Liwen Zhang,<sup>b,d</sup> Jun Chen,<sup>a,d,\*</sup> Xiaohong Zheng,<sup>c,b</sup> Lei Zhang,<sup>b,d,\*</sup>

---

<sup>a</sup>State Key Laboratory of Quantum Optics and Quantum Optics Devices, Institute of Theoretical Physics, Shanxi University, Taiyuan 030006, China

<sup>b</sup>State Key Laboratory of Quantum Optics and Quantum Optics Devices, Institute of Laser Spectroscopy, Shanxi University, Taiyuan 030006, China

<sup>c</sup>Key Laboratory of Materials Physics, Institute of Solid State Physics, HFIPS, Chinese Academy of Sciences, Hefei 230031, China

<sup>d</sup>Collaborative Innovation Center of Extreme Optics, Shanxi University, Taiyuan 030006, China

\*chenjun@sxu.edu.cn and zhanglei@sxu.edu.cn

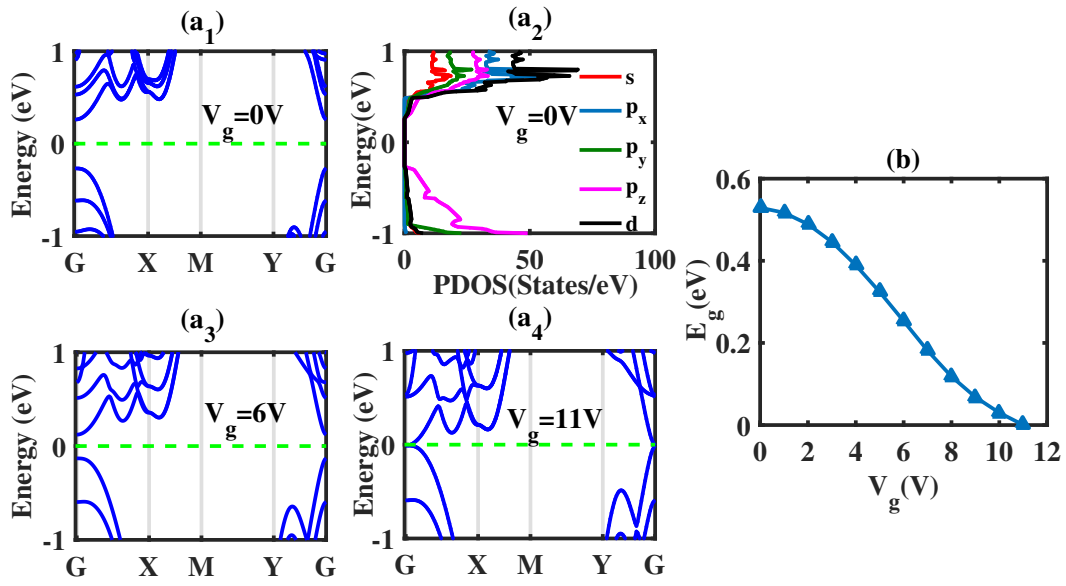

**Figure S1** Band structure of three-layer BP when (a<sub>1</sub>)  $V_g = 0V$ ; (a<sub>3</sub>)  $V_g = 6V$ ; (a<sub>4</sub>)  $V_g = 11V$ . (a<sub>2</sub>) The projected density of states (PDOS) of three-layer BP when  $V_g = 0V$ . (b) Band gap  $E_g$  of three-layer BP versus the applied vertical gate voltage  $V_g$  in the system.

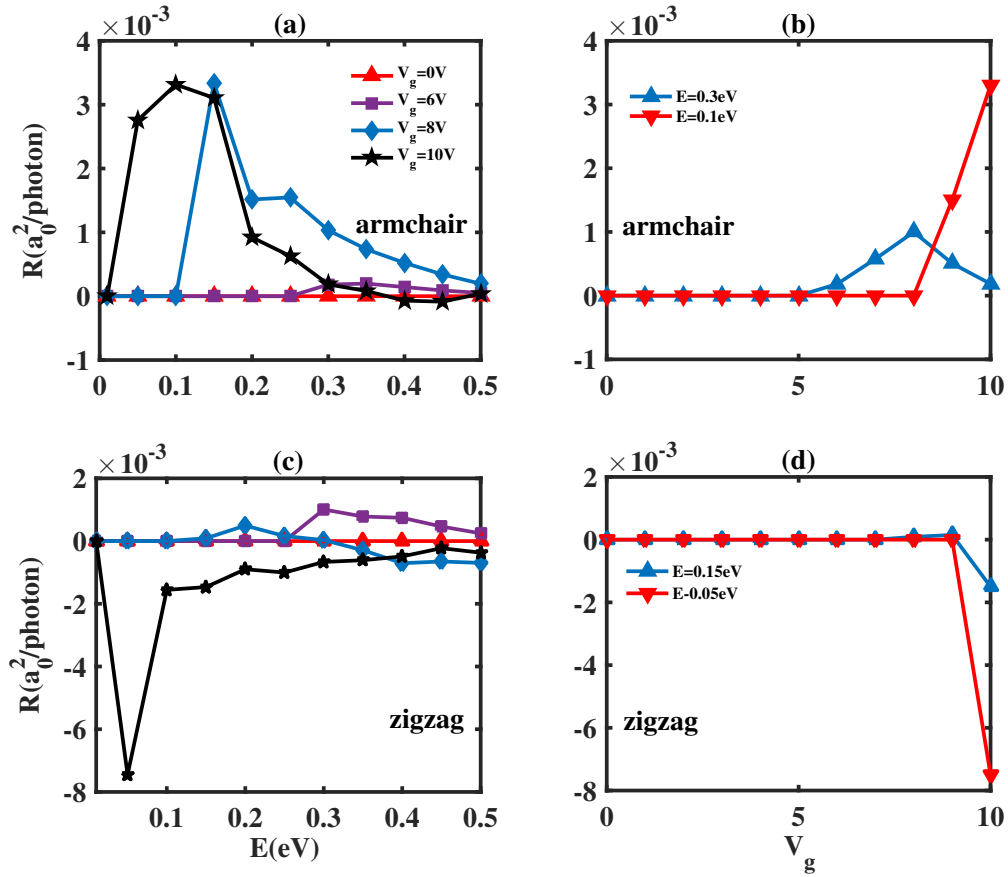

**Figure S2** (a,b) The photoresponse of three-layer BP device along armchair direction versus photon energy  $E$  and the gate voltage  $V_g$  by circularly polarized photogalvanic effect (CPGE), respectively. (c,d) Photoresponse of three-layer BP device along zigzag direction versus photon energy  $E$  and the gate voltage  $V_g$  under illumination by CPGE, respectively. The polarization angle  $\phi = 45^\circ$ .

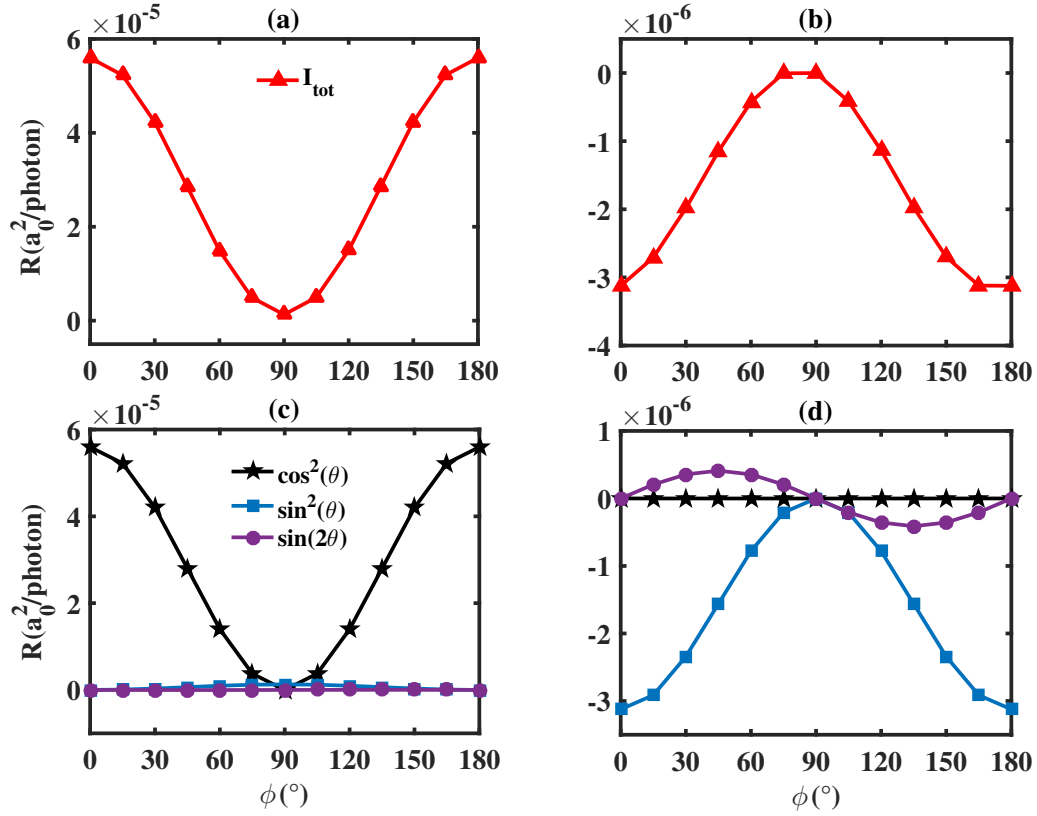

**Figure S3** (a,b) The photoresponse versus the circular polarization angle  $\phi$  along the armchair and zigzag directions, respectively. (c,d) The three components of the photoresponse versus the circular polarization angle  $\phi$  along the armchair and zigzag directions, respectively. The three-layer BP device is illuminated by the circularly polarized light. The photon energy is fixed as  $E = 0.025\text{eV}$ .

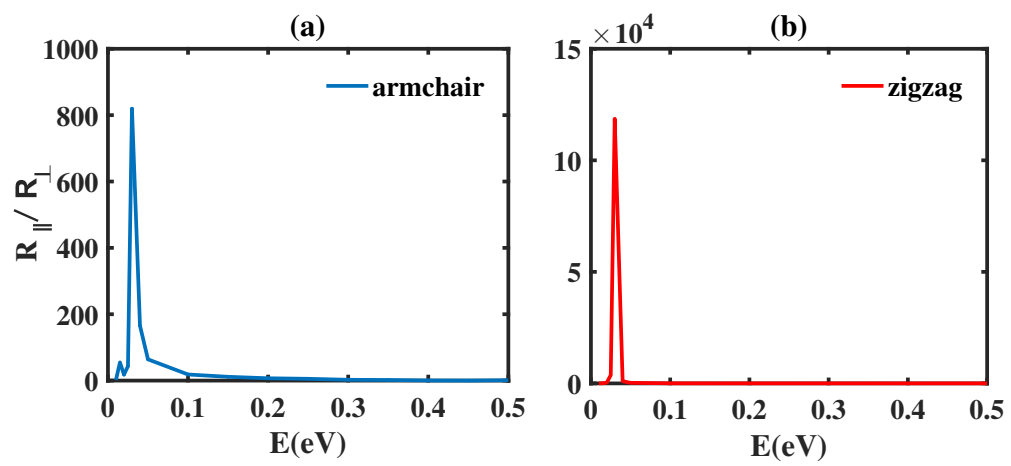

**Figure S4** (a) The extinction ratio versus with photon energy along the armchair and zigzag directions, respectively.
